# Supplementary material
Source: Springer Nature journal article supplement (https://www.springermedizin.de/resource/supplementary/13019_2013_1427_MOESM8_ESM.pdf/9640642)
Supplement: MOESM8 [file 9640642]

| Model  | Study name | Statistics for each study |             |             |         |         | Odds ratio and 95% CI |      |      |      |      |      |       |
|--------|------------|---------------------------|-------------|-------------|---------|---------|-----------------------|------|------|------|------|------|-------|
|        |            | Odds ratio                | Lower limit | Upper limit | Z-Value | p-Value | 0.10                  | 0.20 | 0.50 | 1.00 | 2.00 | 5.00 | 10.00 |
|        | drozd      | 0.665                     | 0.446       | 0.991       | -2.005  | 0.045   |                       |      |      |      |      |      |       |
|        | ivanhoe    | 0.722                     | 0.475       | 1.096       | -1.531  | 0.126   |                       |      |      |      |      |      |       |
|        | Finci      | 0.265                     | 0.146       | 0.482       | -4.359  | 0.000   |                       |      |      |      |      |      |       |
|        | zhuyanbin  | 0.383                     | 0.165       | 0.888       | -2.237  | 0.025   |                       |      |      |      |      |      |       |
|        | olivari    | 0.382                     | 0.189       | 0.772       | -2.679  | 0.007   |                       |      |      |      |      |      |       |
|        | angioi     | 0.337                     | 0.185       | 0.613       | -3.560  | 0.000   |                       |      |      |      |      |      |       |
|        | warren     | 0.982                     | 0.286       | 3.373       | -0.029  | 0.977   |                       |      |      |      |      |      |       |
| Fixed  |            | 0.512                     | 0.413       | 0.635       | -6.103  | 0.000   |                       |      |      |      |      |      |       |
| Random |            | 0.477                     | 0.340       | 0.670       | -4.269  | 0.000   |                       |      |      |      |      |      |       |
